# Supplementary material for: NPM1 directs PIDDosome-dependent caspase-2 activation in the nucleolus
Source: PubMed Central journal article supplement — J Cell Biol. 2017 Jun 5;216(6):1795–810. doi: 10.1083/jcb.201608095 (PMC5461015; doi:10.1083/jcb.201608095), 2017-06-05
Supplement: JCB_201608095_sm.pdf [file JCB_201608095_sm.pdf]

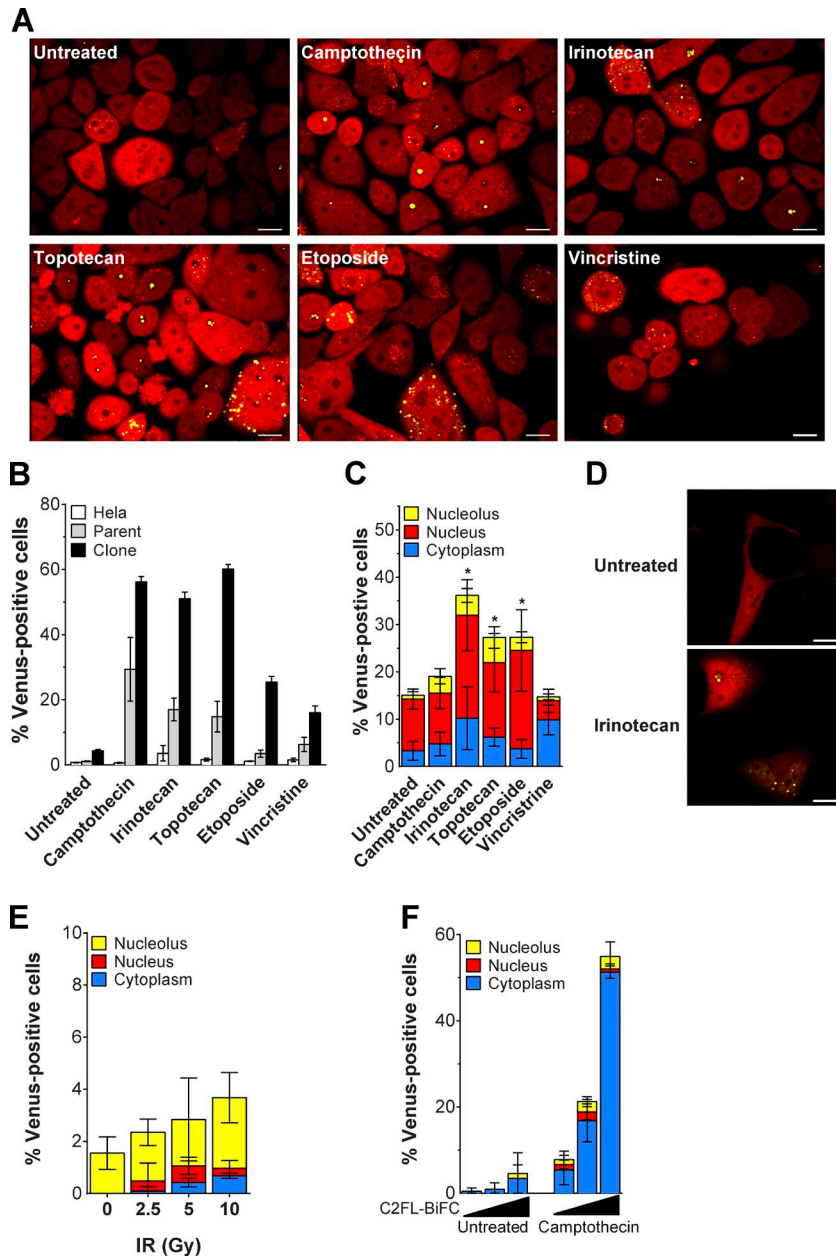

Figure S1. **DNA damaging agents induce caspase-2 BiFC in the nucleolus.** (A) Representative confocal images of HeLa.C2 Pro-BiFC cells that were untreated or treated with camptothecin (100  $\mu$ M), irinotecan (100  $\mu$ M), topotecan (100  $\mu$ M), etoposide (100  $\mu$ M), or vincristine (100  $\mu$ M), in the presence of qVD-OPH (20  $\mu$ M) show mCherry expression throughout the cell (red) and caspase-2 BiFC (yellow). Bars, 10  $\mu$ m. (B) HeLa or HeLa.C2 Pro-BiFC parent or clone cells treated as in A were analyzed by flow cytometry. (C) U2OS cells stably expressing the C2 Pro-VC-2A-C2 Pro-VN-2A-mCherry were treated with camptothecin (100  $\mu$ M), irinotecan (100  $\mu$ M), topotecan (100  $\mu$ M), etoposide (100  $\mu$ M), or vincristine (10  $\mu$ M), in the presence of qVD-OPH (20  $\mu$ M). The percentage of Venus-positive cells and the proportion of Venus-positive cells that showed caspase-2 BiFC in the cytoplasm, nucleus, or nucleolus were determined at 16 h from microscopy images of a minimum of 50 confocal microscopy images. Results are the mean of four independent experiments  $\pm$  SD. \*,  $P < 0.05$ . (D) Representative images of cells from C with caspase-2 BiFC shown in yellow. Bars, 10  $\mu$ m. (E) HeLa.C2 Pro-BiFC cells were treated with or without the indicated doses of IR in the presence of qVD-OPH (20  $\mu$ M). The percentage of Venus-positive cells and the proportion of the Venus-positive cells that showed caspase-2 BiFC in the cytoplasm, nucleus, or nucleolus were determined at 16 h from microscopy images of a minimum of 50 confocal microscopy images. Results represent triplicate counts  $\pm$  SD. (F) HeLa cells were transiently transfected with plasmids encoding C2FL(C320S) BiFC components (0.25, 0.5, or 1  $\mu$ g) for 24 h followed by treatment with camptothecin (100  $\mu$ M). The percentage of Venus-positive cells and the proportion of the Venus-positive cells that showed caspase-2 BiFC in the cytoplasm, nucleus, or nucleolus were determined at 16 h from a minimum of 50 microscopy images. Results represent triplicate counts  $\pm$  SD.

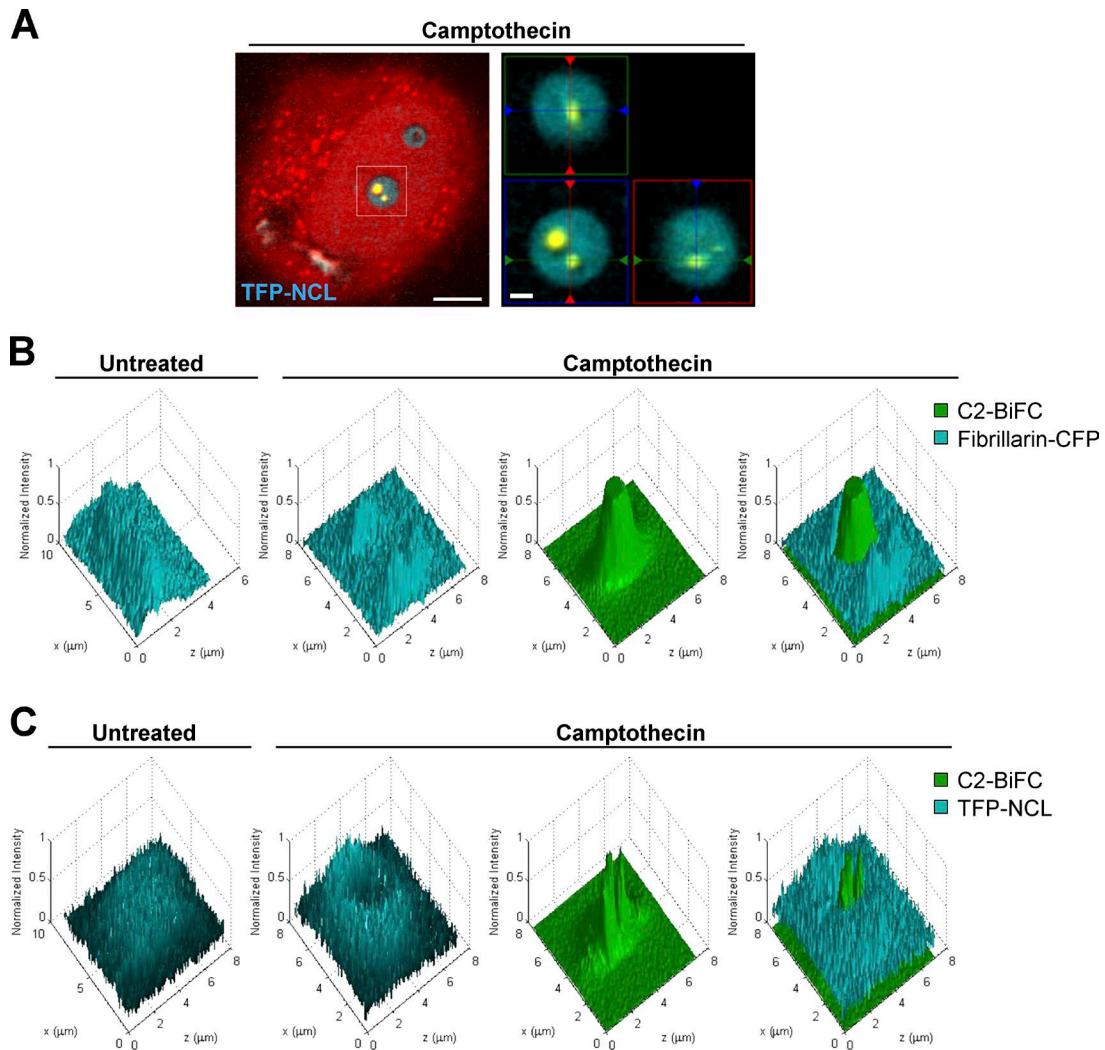

Figure S2. **Localization of caspase-2 activation platforms within the nucleolus.** (A) Representative image of HeLa.C2 Pro-BiFC cells transfected with TFP-NCL (2 µg) followed by treatment with camptothecin (10 µM) in the presence of qVD-OPH (20 µM) showing a cell (red) with two caspase-2 BiFC puncta (yellow) in the nucleolus (marked by NCL fluorescence [blue]). Bar, 10 µm. 3D reconstructions composed from 0.2-µm serial confocal images through the z-plane of the cell of the white boxed regions were made. The orthogonal-slice view is shown (right). The middle panel is the xy plane, the right panel is the yz plane, and top panel is the xz plane. The yz and xz planes intersect according to the crosshairs. Bar, 2 µm. 3D graphs of pixel intensities of Fibrillarin-CFP and C2 BiFC signals (B) and TFP-NCL and C2 BiFC signals (C) in representative untreated and camptothecin-treated HeLa.C2 Pro-BiFC cells.

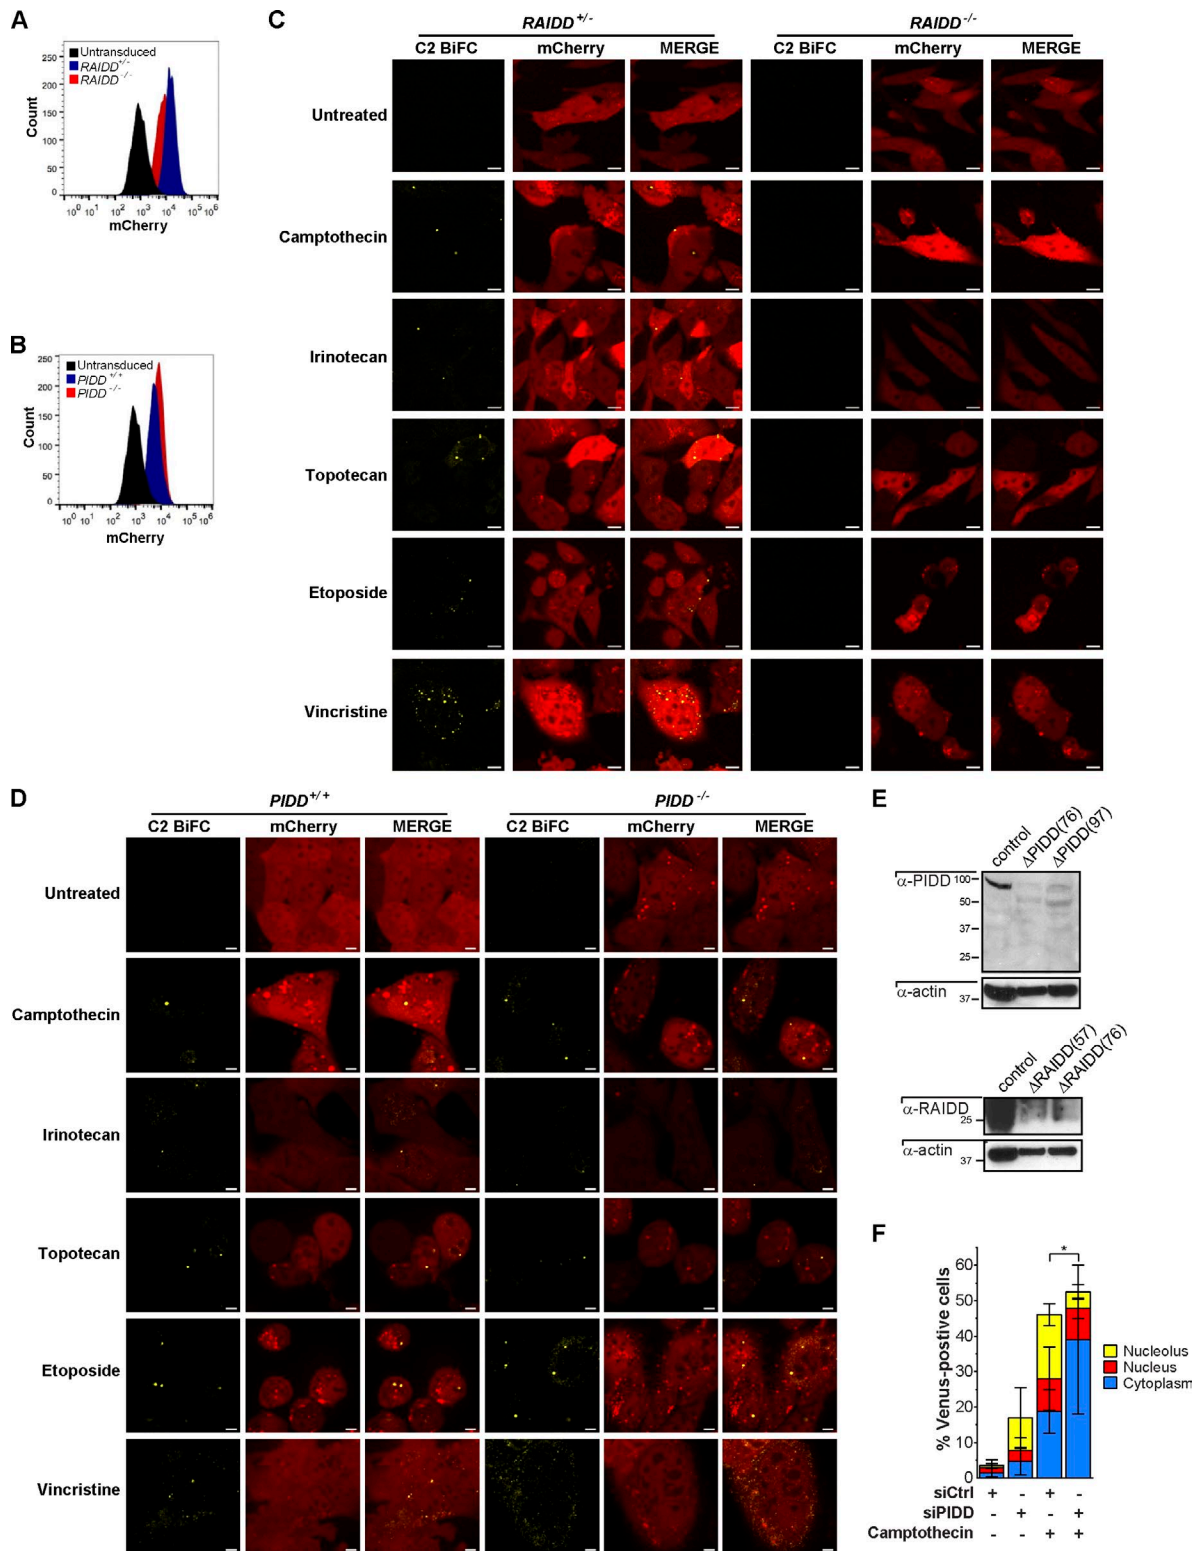

Figure S3. **RAIDD is required for caspase-2 BiFC but PIDD is only required for caspase-2 BiFC in the nucleolus.** *Raidd*<sup>+/-</sup> and *Raidd*<sup>-/-</sup> MEFs (A) and *Pidd*<sup>+/+</sup> and *Pidd*<sup>-/-</sup> MEFs (B) from littermate embryos were transduced with pRRL.C2 Pro-VC-2A-C2 Pro-VN-2A-mCherry and selected for stable expressors by sorting for equal mCherry fluorescence. Representative confocal images show caspase-2 BiFC (yellow) and mCherry expression (red) in *Raidd*<sup>+/-</sup> and *Raidd*<sup>-/-</sup> C2 Pro-BiFC MEFs (C) and *Pidd*<sup>+/+</sup> and *Pidd*<sup>-/-</sup> C2 Pro-BiFC MEFs (D) treated as in Fig. 5 (A and C), respectively. Bars, 5  $\mu$ m. Images representing untreated and camptothecin-treated cells from C are also shown in Fig. 5 B, and images representing untreated cells in D are also shown in Fig. 5 D. (E) Lysates from HeLa.C2 Pro-BiFC cells or HeLa.C2 Pro-BiFC cells with *PIDD* or *RAIDD* deleted by CRISPR/Cas9 were immunoblotted for PIDD (top) or RAIDD expression (bottom). (F) HeLa.C2 Pro-BiFC cells were transfected with the indicated siRNAs in the presence of qVD-OPH (20  $\mu$ M). 48 h later, cells were left untreated or treated with camptothecin (100  $\mu$ M). The percentage of Venus-positive cells and the proportion of the Venus-positive cells that showed caspase-2 BiFC in the cytoplasm, nucleus, or nucleolus was determined at 24 h from a minimum of 50 microscopy images per well. Results represent the mean of three independent experiments  $\pm$  SD. \*,  $P < 0.05$ .

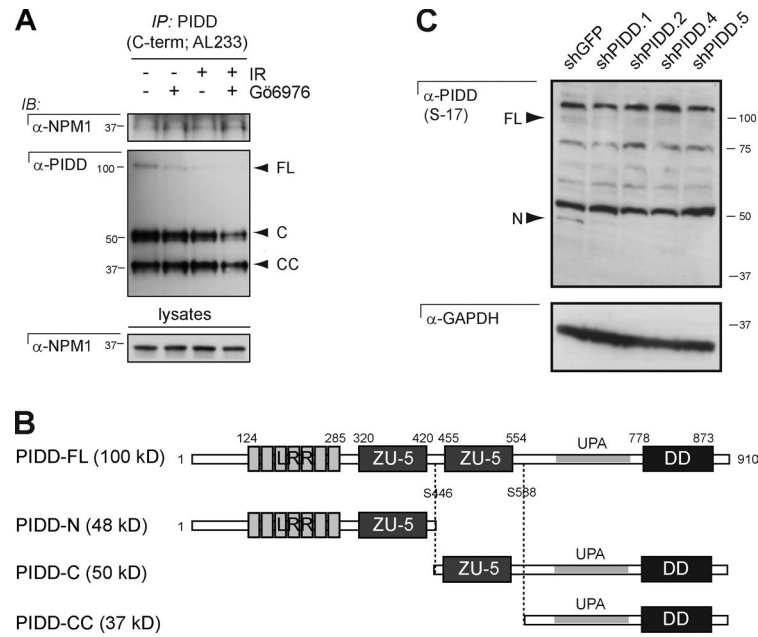

Figure S4. **NPM1 interacts with PIDD after DNA damage.** (A) HeLa cells treated with or without Gö6976 (1  $\mu$ M)  $\pm$  IR (10 Gy) were harvested 24 h after IR, lysed, and immunoprecipitated with C-terminal PIDD antibody (clone AL233). Immunoprecipitates were analyzed by Western blot. (B) Schematic representation of PIDD-FL and PIDD autocleavage products. Indicated are molecular weights of cleavage sites (Tinel et al., 2007). LRR, LRR domain; ZU-5, ZO-1 and UNC5-like; UPA, uncharacterized protein domain in UNC5, PIDD, and Ankyrin family of proteins (designates the putative PIDD oligomerization domain; Janssens and Tinel, 2012). (C) HeLa cells stably expressing the indicated shRNAs were analyzed by Western blot with indicated antibodies.

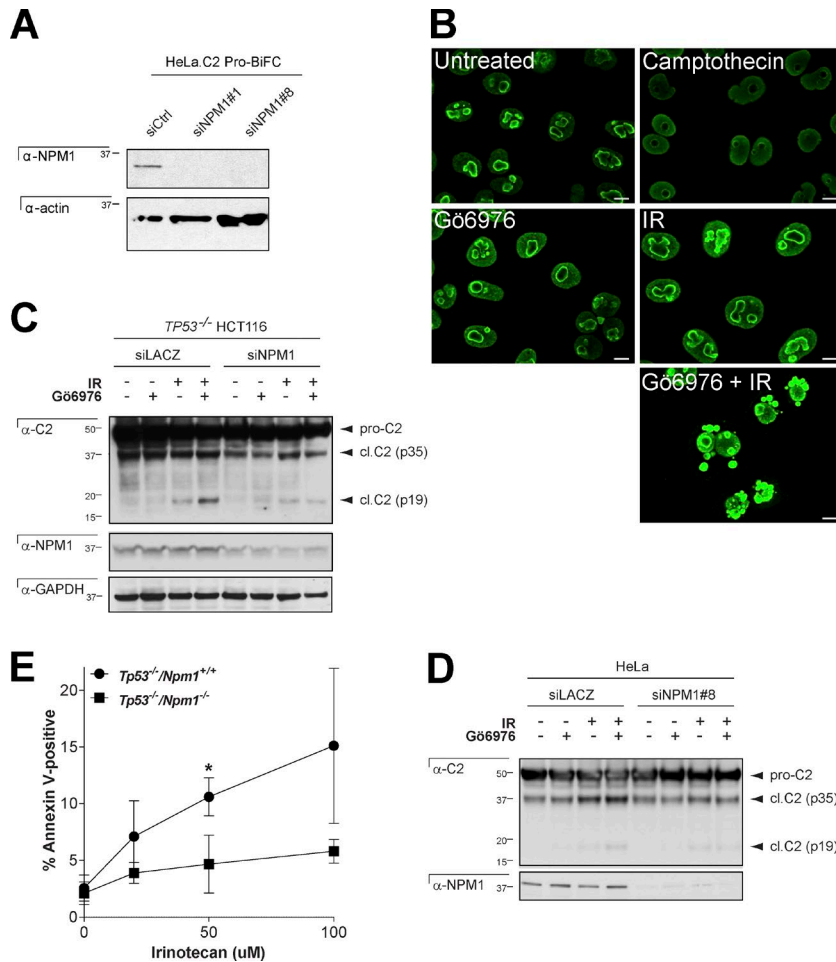

Figure S5. **NPM1 is required for PIDDosome signaling.** (A) Camptothecin-treated HeLa.C2 Pro-BiFC cell lysates transfected with control or NPM1 siRNAs. (B) HeLa cells were untreated, treated with camptothecin (100 μM), or 50 Gy IR ± Gö6976 (1 μM) in the presence of qVD-OPH (20 μM). After 16 h, cells were fixed and stained with anti-NPM1 antibody and Alexa Fluor 488-conjugated secondary antibody. Labeled NPM1 is shown in green. Bars, 10 μm. *Tp53*<sup>-/-</sup> HCT116 cells (C) or HeLa cells (D) transfected with the indicated siRNAs were treated with or without 10 Gy IR ± Gö6976 (1 μM) and harvested 24 h after IR. Lysates were analyzed by Western blot. (E) *Tp53*<sup>-/-</sup> MEFs of indicated *Npm1* genotypes were treated with or without the indicated concentrations of irinotecan. Apoptosis was assessed by flow cytometry for Annexin V binding 16 h after treatment. Results represent the mean of three independent experiments ± SD. \*, P < 0.05.

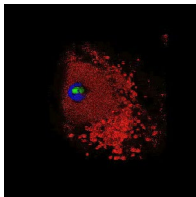

Video 1. **Camptothecin-induced caspase-2 BiFC localizes to the nucleolus.** 3D isosurface rendering reconstruction, rotated around the yz-axis of confocal images through the x-plane of a HeLa.C2Pro BiFC cell expressing fibrillarin-CFP treated with camptothecin (10 μM). Video shows caspase-2 BiFC (green), followed by a merge with the nucleolar protein fibrillarin (blue) followed by a merge with mCherry, which is expressed throughout the cell (red).

Provided online as an Excel file is Table S1 showing NPM1 peptides from Flag-PIDD IP (HeLa+IR+G66976), Sample 4B (~35-37-kD bands on Coomassie).

## References

- Janssens, S., and A. Tinel. 2012. The PIDDosome, DNA-damage-induced apoptosis and beyond. *Cell Death Differ.* 19:13–20. <http://dx.doi.org/10.1038/cdd.2011.162>
- Tinel, A., S. Janssens, S. Lippens, S. Cuenin, E. Logette, B. Jaccard, M. Quadroni, and J. Tschopp. 2007. Autoproteolysis of PIDD marks the bifurcation between pro-death caspase-2 and pro-survival NF-κB pathway. *EMBO J.* 26:197–208. <http://dx.doi.org/10.1038/sj.emboj.7601473>
